# Supplementary material
Source: PubMed Central journal article supplement (PMC3491519)
Supplement: 1206893109_pnas.201206893SI.pdf [file 1206893109_pnas.201206893SI.pdf]

# Supporting Information

Perdomo et al. 10.1073/pnas.1206893109

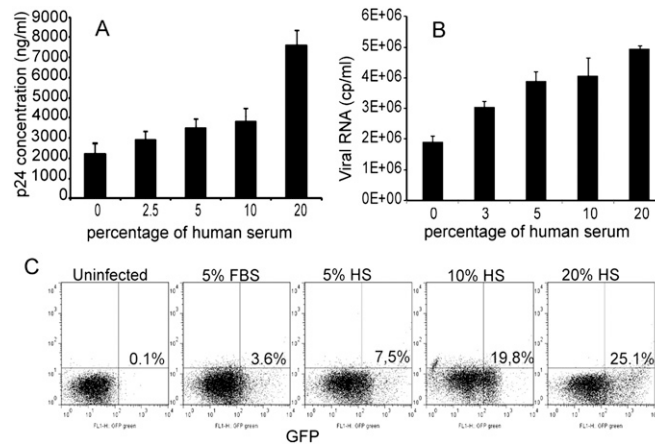

**Fig. S1.** Effect of human serum (HS) on HIV-1 infectivity. The HIV<sub>III</sub>B viral output was studied in different cell lines after supplementation with heat-inactivated human serum (HIHS) and read as (A) p24 concentration in culture supernatant of H9 cells at day 7 postinfection. (B) Copies of viral RNA in culture supernatant of U87 cells at day 5 postinfection. (C) green fluorescent protein (GFP) expression of cell line CEM-GFP cells at day 7 postinfection. All values shown are the mean values  $\pm$  the SD from four replicates. Comparisons of samples cultured at the highest serum concentration and controls were statistically significant ( $P < 0.01$ ).

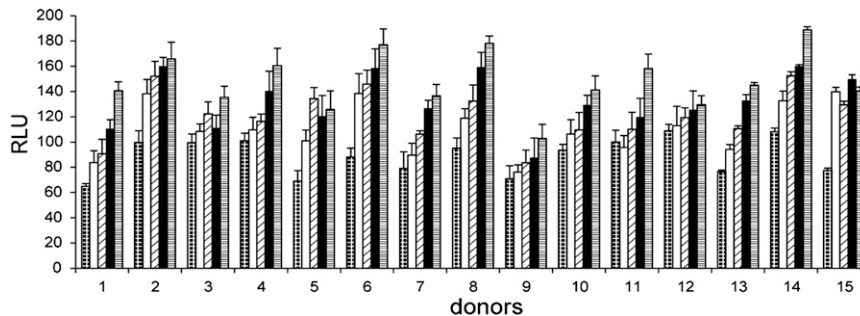

**Fig. S2.** Interindividual variation of HS. TZM-bl cells were infected with HIV<sub>III</sub>B and cultured in the presence of 15 individual serum samples from uninfected individuals. Each serum sample was tested at 3% (squared bars), 5% (white bars), 10% (diagonal-line bars), 20% (black bars), or 30% (horizontal-line bars) (vol/vol). All values shown are the mean values  $\pm$  the SD from four replicates.

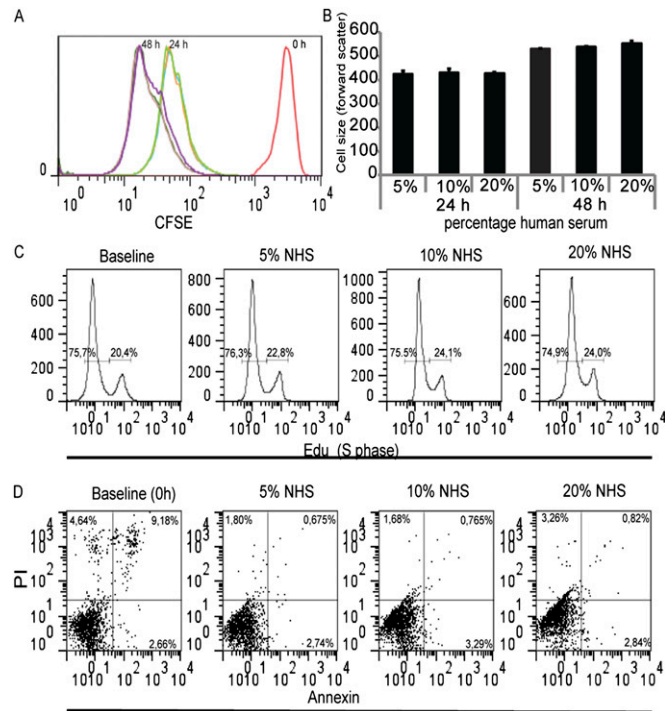

**Fig. S3.** Effect of human serum (HS) on cell cycle, cell proliferation, and apoptosis of uninfected TZM-bl cells. (A) TZM-bl cells were stained with CFSE and cultured in the presence of 5, 10, or 20% nonheat-inactivated human serum (NHS). Cell proliferation was followed after 24 and 48 h in culture by flow cytometry. Represented is the overlay of the carboxyfluorescein succinimidyl ester (CFSE) expression by progeny cells cultured at the different serum concentrations. (B) Cell size measured as mean of forward scatter at 24 h and 48 h in culture with NHS. (C) Percentage of cells on S phase of the cell cycle as determined by incorporation of the fluorescent thymidine analog 5-ethynyl-2'-deoxyuridine (Edu) after 48 h in culture with NHS. (D) Percentage of cells expressing annexinV (as apoptosis marker) and/or propidium iodide (PI) (as necrosis marker) after 48 h in culture with NHS.

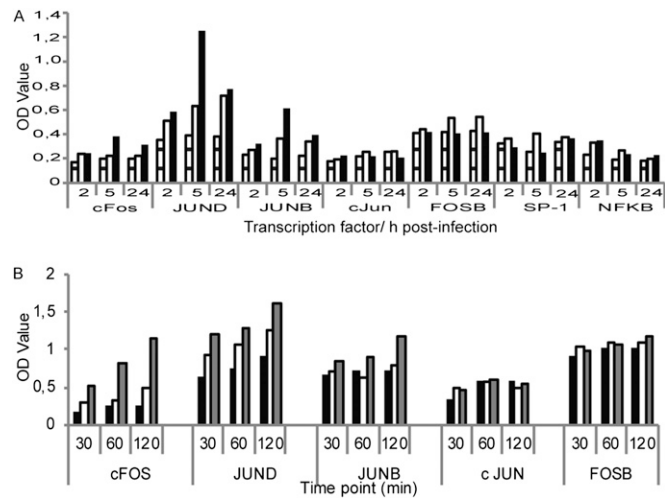

**Fig. S4.** Effect of HS on transcription. (A) TZM-bl cells were infected with HIV<sub>IIIB</sub> and cultured in the presence of 2% FBS (horizontal-line bars), 5% NHS (white bars), or 20% (vol/vol) NHS (black bars). Nuclear fractions were extracted at the specified time points and tested for expression of activator protein-1 (AP-1) family, specificity protein-1 (SP-1), and nuclear factor kappa beta (NFκB) transcription factors. (B) TZM-bl cells were pretreated for 30 min with 20 μM of U0126 before the addition of NHS. Represented are U0126-treated cells cultured in 2% FBS (black bars), U0126-treated cells cultured with 20% NHS (white bars), and, as controls, untreated cells cultured with 20% NHS (gray bars). The nuclear extracts were collected at the specified time points and tested for AP-1 activation.

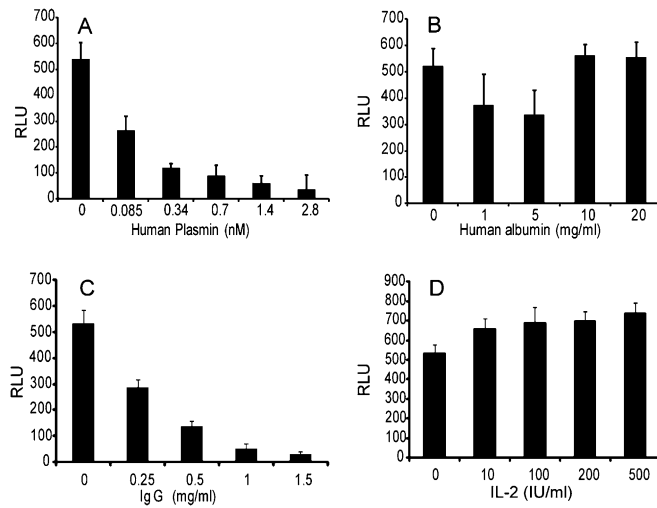

**Fig. 55.** Effect of individual serum components on HIV<sub>III</sub> infectivity. (A) Purified human plasmin, (B) purified albumin, (C) total purified human IgG, and (D) IL-2 were tested in the TZM-bl assay for their potential role in enhancing HIV infectivity. All values shown are the mean values  $\pm$  the SD from four replicates.

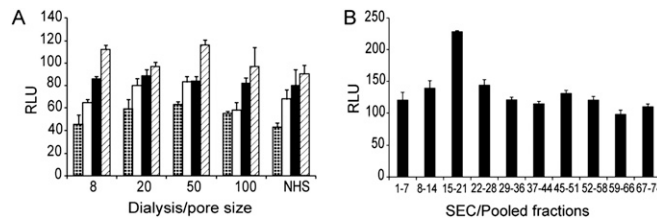

**Fig. 56.** Fractionation of human serum. (A) NHS was dialyzed with membranes of different pore size followed by test of the fractions at 5% (white bars), 10% (black bars), or 20% (diagonal-line bars) (vol/vol) on the TZM-bl cells. As a control dialyzed FBS (squared bars) was tested at 5% concentration. (B) Fractionation by size exclusion chromatography and test of pooled fractions in the TZM-bl assay. All values shown are the mean values  $\pm$  the SD from four replicates.
